# Supplementary material for: The Influence of Polysaccharides/TiO2 on the Model Membranes of Dipalmitoylphosphatidylglycerol and Bacterial Lipids
Source: MDPI journal article supplement (doi:10.3390/molecules27020343), 2022-01-06
Supplement: s1 [file s1]

# The Influence of Polysaccharides/TiO<sub>2</sub> on the Model Membranes of Dipalmitoylphosphatidylglycerol and Bacterial Lipids

Agata Ładniak <sup>1,2,\*</sup>, Małgorzata Jurak <sup>1</sup>, Marta Palusińska-Szys <sup>3</sup> and Agnieszka Ewa Wiącek <sup>1</sup>

<sup>1</sup> Department of Interfacial Phenomena, Institute of Chemical Sciences, Faculty of Chemistry, Maria Curie-Skłodowska University, M. Curie-Skłodowska Sq. 3, 20-031 Lublin, Poland, e-mail: \*agata.gozdecka@poczta.umcs.lublin.pl; malgorzata.jurak@poczta.umcs.lublin.pl; a.wiacek@poczta.umcs.lublin.pl

<sup>2</sup> Centre for Interdisciplinary Research, Laboratory of X-Ray Optics, Faculty of Science and Health, The John Paul II Catholic University of Lublin, Konstantynów 1J, 20-708 Lublin, Poland

<sup>3</sup> Department of Genetics and Microbiology, Institute of Biological Sciences, Faculty of Biology and Biotechnology, Maria Curie-Skłodowska University, Akademicka 19, 20-033 Lublin, Poland, e-mail: marta.palusinska-szys@mail.umcs.pl

\* Correspondence: author: Agata Ładniak – [agata.gozdecka@poczta.umcs.lublin.pl](mailto:agata.gozdecka@poczta.umcs.lublin.pl);

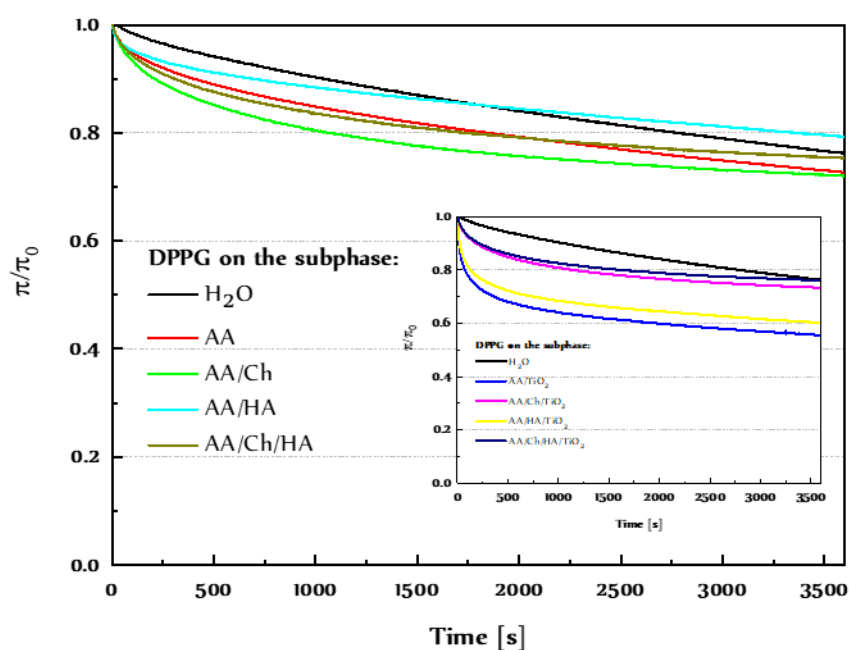

**Figure S1.**  $\pi/\pi_0=f(t)$  relationships for the DPPG monolayer on biopolymers-containing subphases (inset: for TiO<sub>2</sub>-containing subphases).

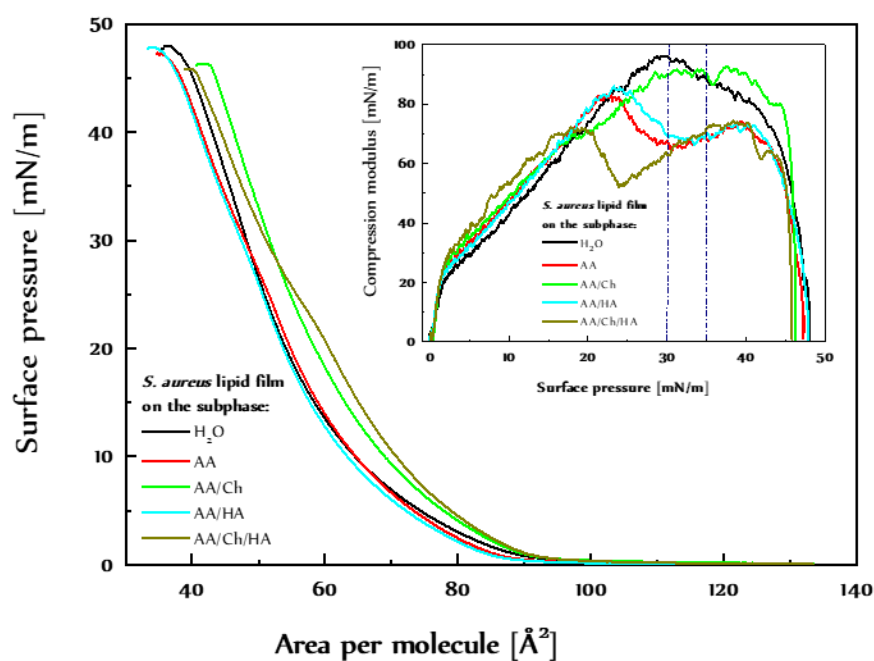

**Figure S2.**  $\pi$ -A isotherms obtained by means of the Langmuir technique and determined based on them  $C_s^{-1} = f(\pi)$  relationships (inset) for the *S. aureus* lipid film on biopolymers-containing subphases.

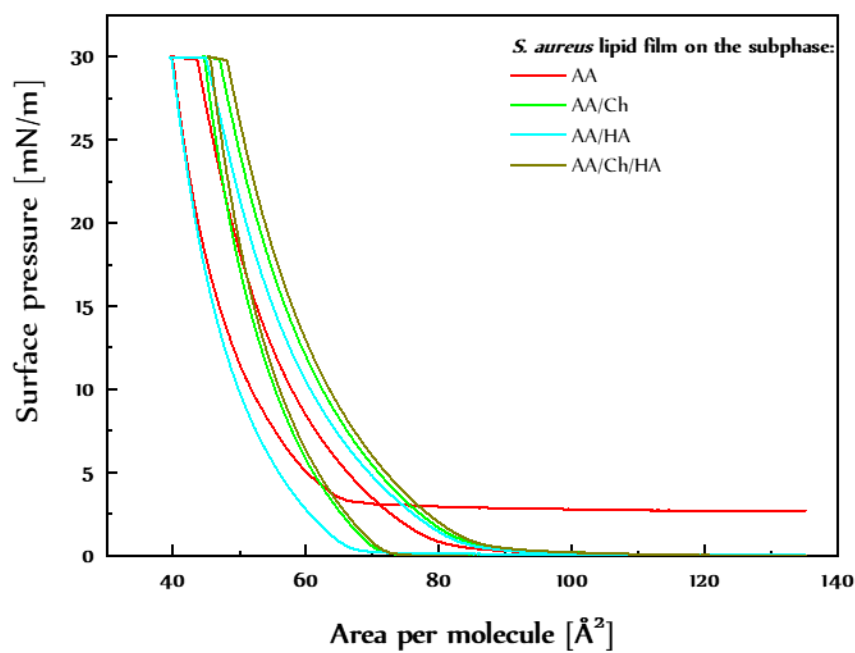

**Figure S3.** Hysteresis loops obtained by compression and decompression of the *S. aureus* lipid film on biopolymers-containing subphases.

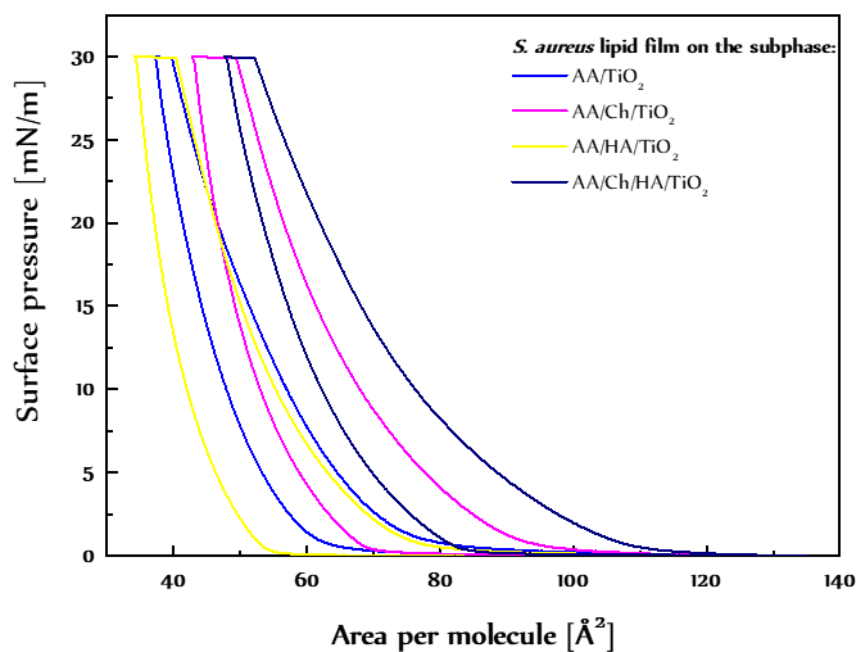

**Figure S4.** Hysteresis loops obtained by compression and decompression of the *S. aureus* lipid film on TiO<sub>2</sub>-containing subphases.

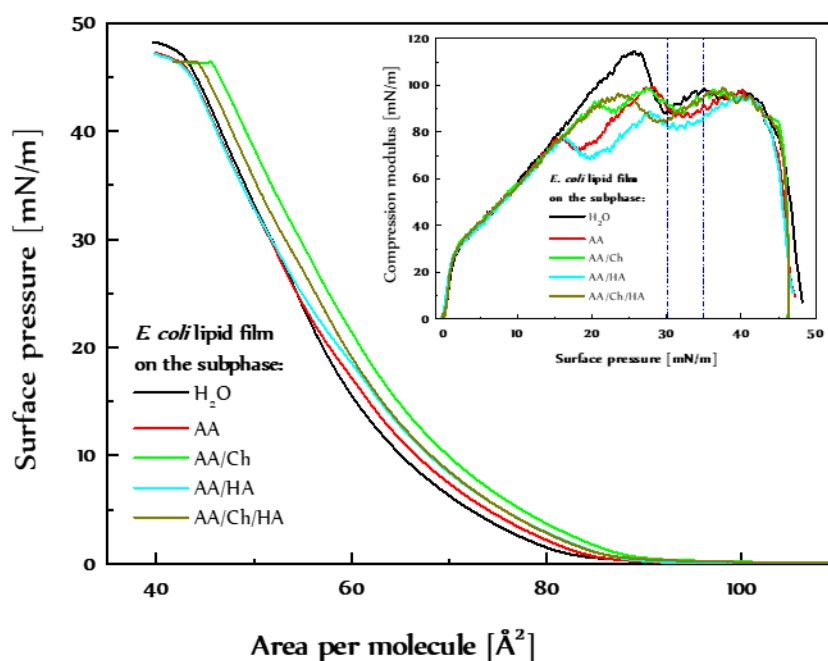

**Figure S5.**  $\pi$ -A isotherms obtained by means of the Langmuir technique and determined based on them  $C_s^{-1} = f(\pi)$  relationships (inset) for the *E. coli* lipid film on biopolymers-containing subphases.

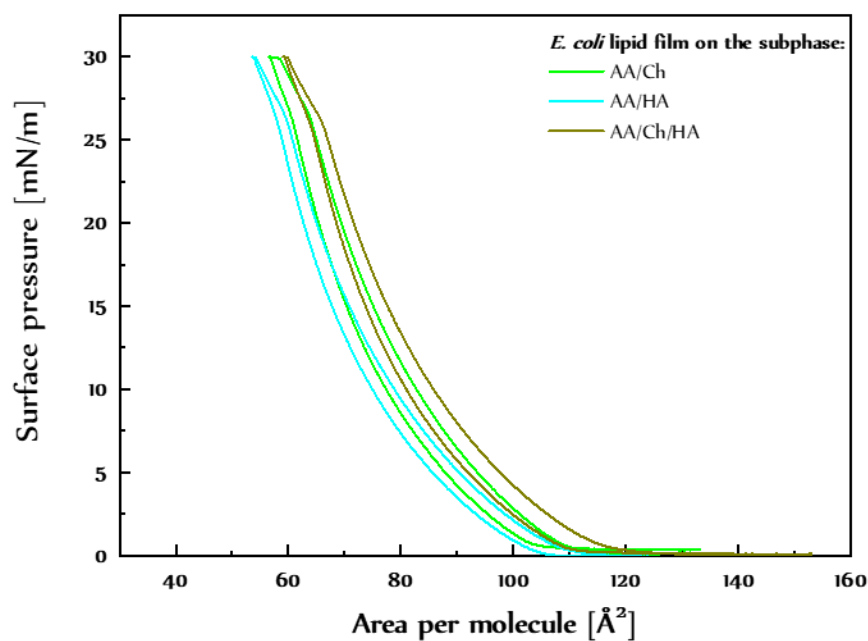

**Figure S6.** Hysteresis loops obtained by compression and decompression of the *E. coli* lipid film on biopolymers-containing subphases.

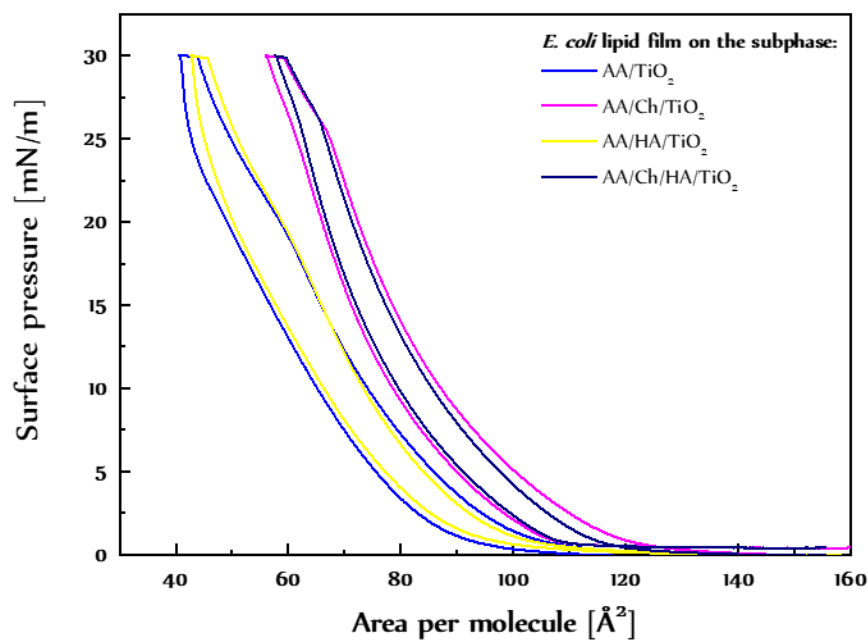

**Figure S7.** Hysteresis loops obtained by compression and decompression of the *E. coli* lipid film on  $\text{TiO}_2$ -containing subphases.
